# Supplementary material for: Cross-Contamination of a UROtsa Stock with T24 Cells – Molecular Comparison of Different Cell Lines and Stocks
Source: PLoS One. 2013 May 17;8(5):e64139. doi: 10.1371/journal.pone.0064139 (PMC3656924; doi:10.1371/journal.pone.0064139)
Supplement: Figure S4 — STR profile analysis of the cell line stocks UROtsa-1, UROtsa-4, UROtsa-3/T24, and the cell line T24. (PDF) [file pone.0064139.s004.pdf]

Archive with 3 entries (2 files):
- Johnen_T24-UROtsa STR FigS4.pdf
- __MACOSX/
- __MACOSX/._Johnen_T24-UROtsa STR FigS4.pdf
